# Supplementary material
Source: Springer Nature journal article supplement (https://www.springermedizin.de/resource/supplementary/12957_2010_675_MOESM3_ESM.pdf/9565480)

5

8

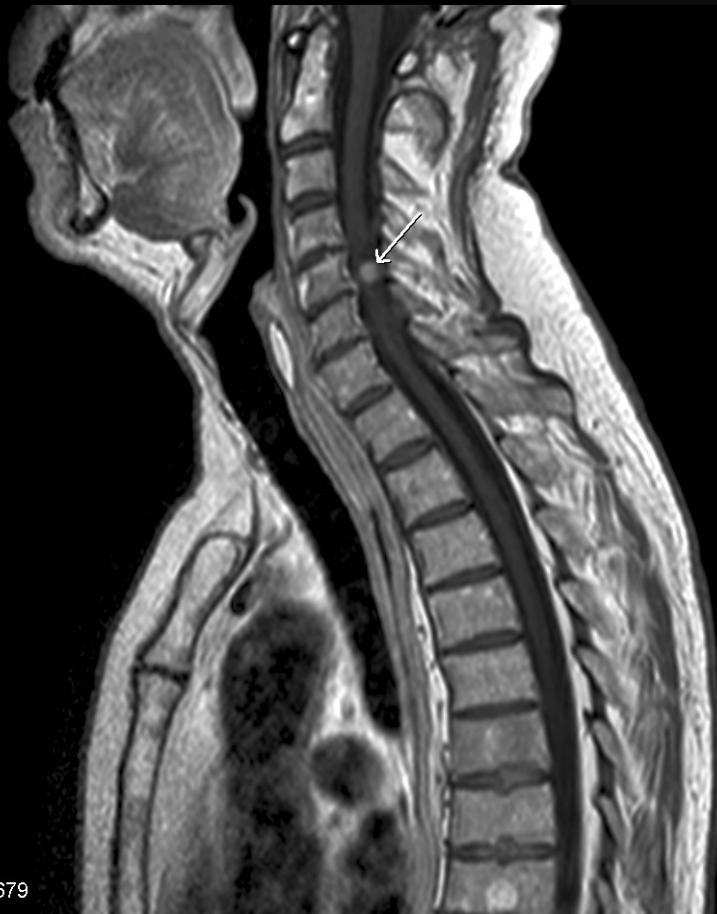

W 1180 : L 679

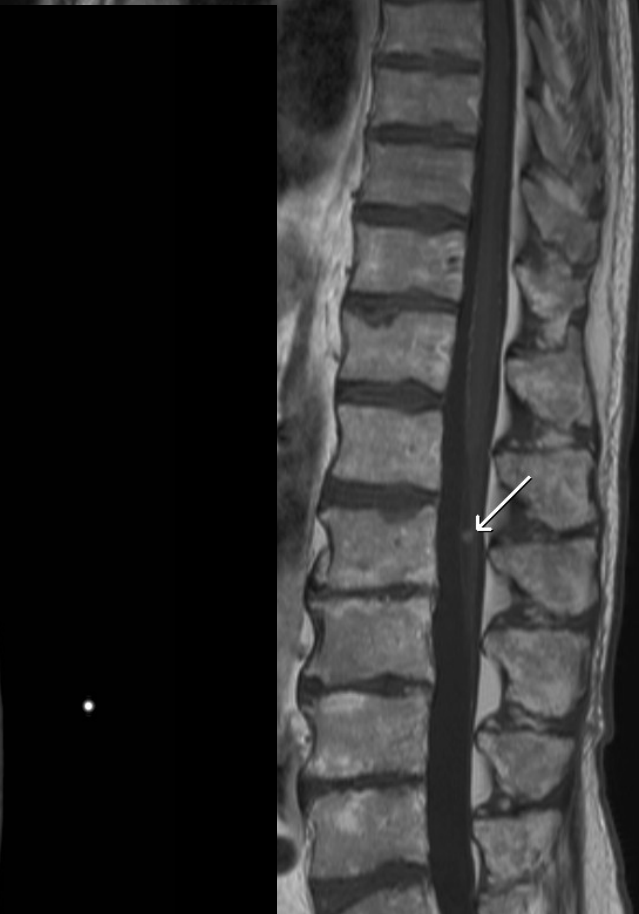

W 1313 : L 639

Supplement: MOESM3 [file 9565480]
